# Supplementary material
Source: PubMed Central journal article supplement (PMC2668047)
Supplement: mmc1.pdf [file mmc1.pdf]

## Supplemental Data

### Mutations in DDR2 Gene Cause SMED

#### with Short Limb and Abnormal Calcifications

Ruth Bargal, Valerie Cormier-Daire, Ziva Ben-Neriah, Martine Le Merrer, Jacob Sosna, Judith Melki,<sup>1</sup>  
Sarah F Smithson, Zvi Borochowitz, Ruth Belostotsky, and Annick Raas-Rothschild

Table S 1(supplemental data): Primers used for the amplification of 5 fragments (A – E) of the DDR2 c.DNA

| Fragment [exons] | Forward primer        | Reverse primer       | Expected Size bp |
|------------------|-----------------------|----------------------|------------------|
| A [1-4]          | GAATCCTCAGAATGTGAGGT  | AGCAGGAACAGCACCAAGAG | 500              |
| B[4-9]           | CTCCAGTTCCAACACCATCTT | TTCCGCCAGCCCACATAGTC | 810              |
| C [9-14]         | CACCCAGACCCATGAATACC  | CACTATGTCAGCCTCTGCAT | 840              |
| D [13-17]        | GGTCCAACCTCGACTTACGAT | GGTGTAACGACAGTGCCTA  | 660              |
| E[17-19]         | GAATACATGGAGAATGGAGAT | GGAGTGGCATAGGCATGGGT | 700              |
